# Supplementary material for: Antiproliferative Ruthenium Complexes Containing Curcuminoid Ligands Tested In Vitro on Human Ovarian Tumor Cell Line A2780, towards Their Capability to Modulate the NF-κBTranscription Factor, FGF-2 Growth Factor, and MMP-9 Pathway
Source: MDPI journal article supplement (doi:10.3390/molecules27144565), 2022-07-18

# **Antiproliferative ruthenium complexes containing curcuminoid ligands tested *in vitro* on human ovarian tumor cell line A2780, towards their capability to modulate the NF- $\kappa$ B transcription factor, FGF-2 growth factor and MMP-9 pathway**

Janka Leskovská<sup>1\*</sup>, Natalia Miklášová<sup>1\*</sup>, Paul-Milan Kubelac<sup>2,3</sup>, Patriciu Achimas-Cadariu<sup>2,4</sup>, Jindra Valentová<sup>1</sup>, Mário Markuliak<sup>1</sup>, Eva Fischer-Fodor<sup>2</sup>

<sup>1</sup> Department of Chemical Theory of Drugs, Faculty of Pharmacy, Comenius University in Bratislava, Kalinčiakova 8, 83104 Bratislava, Slovakia  
leskovska5@uniba.sk (J.L.); miklasova@fpharm.uniba.sk (N.M.), valentova@fpharm.uniba.sk (J.V); markuliak@fpharm.uniba.sk (M.M.)

<sup>2</sup> Institute of Oncology “Prof.Dr.I.Chiricuta” Cluj-Napoca, RO-400015, Romania; fischer.eva@iocn.ro (E.F-F.), paulkubelac@yahoo.com (P.-M.K.), patrick.achimas@hotmail.com (P.A.-C.)

<sup>3</sup> Department of Oncology, “Iuliu Hatieganu” University of Medicine and Pharmacy, RO-400012, Cluj-Napoca, Romania

<sup>4</sup> Department of Oncological Surgery and Gynecological Oncology, “Iuliu Hatieganu” University of Medicine and Pharmacy, RO-400012, Cluj-Napoca, Romania.

\* Correspondence: leskovska5@uniba.sk (J.L.); miklasova@fpharm.uniba.sk (N.M.); Tel.: +421-250-117-322 (J.L.); +421-250-117-327 (N.M.)

# NMR, HRMS and IR spectra of free ligands and ruthenium complexes 1,2,3 and 4

NMR Spectrum of **BDMC**

PROTON\_01

<sup>1</sup>H NMR, 400 MHz, AutoX\_DB

JL-2fp

CD3OD

21 Apr 2021

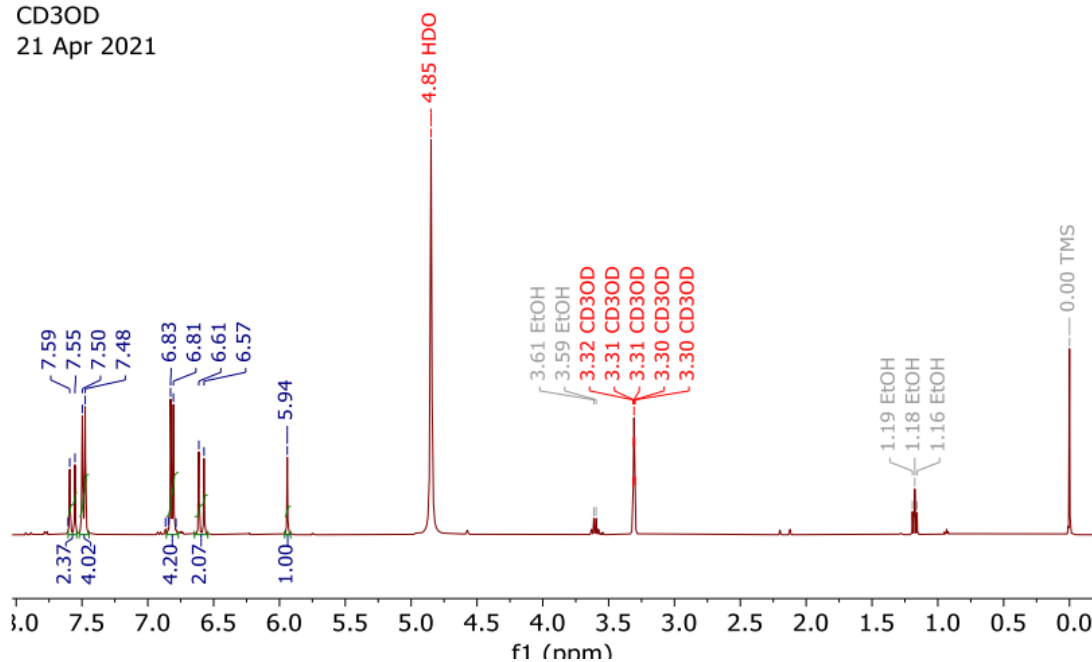

CARBON\_01

<sup>13</sup>C NMR, 100 MHz, AutoX\_DB

JL-2fp

CD3OD

21 Apr 2021

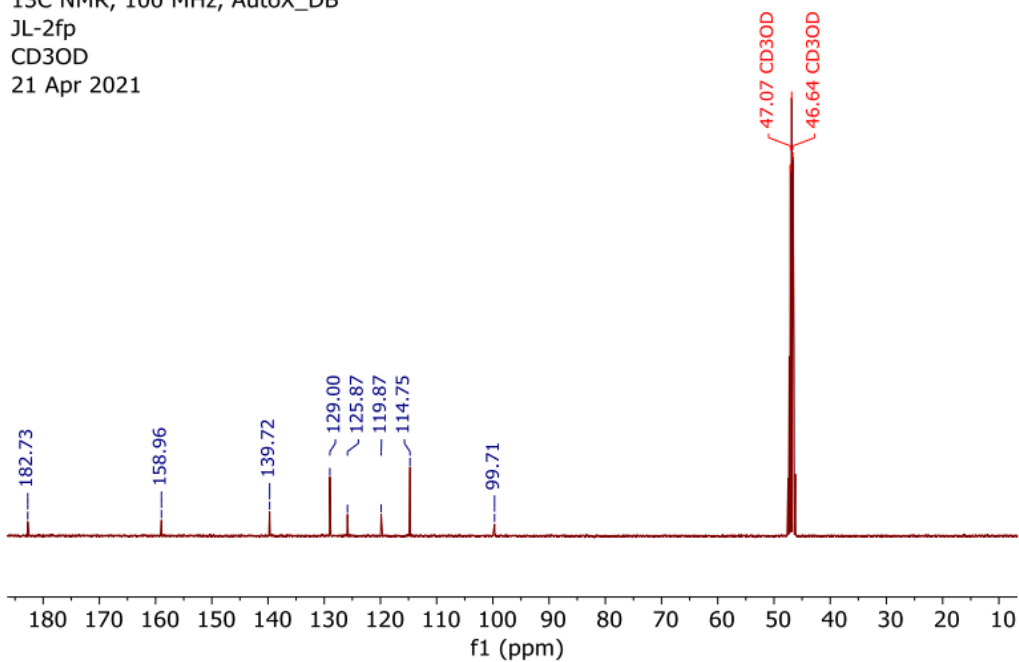

# NMR Spectrum of Syringaldehyde curcumin

PROTON\_01

<sup>1</sup>H NMR, 400 MHz, AutoX\_DB

NM-167

CDCl<sub>3</sub>

10 Jun 2019

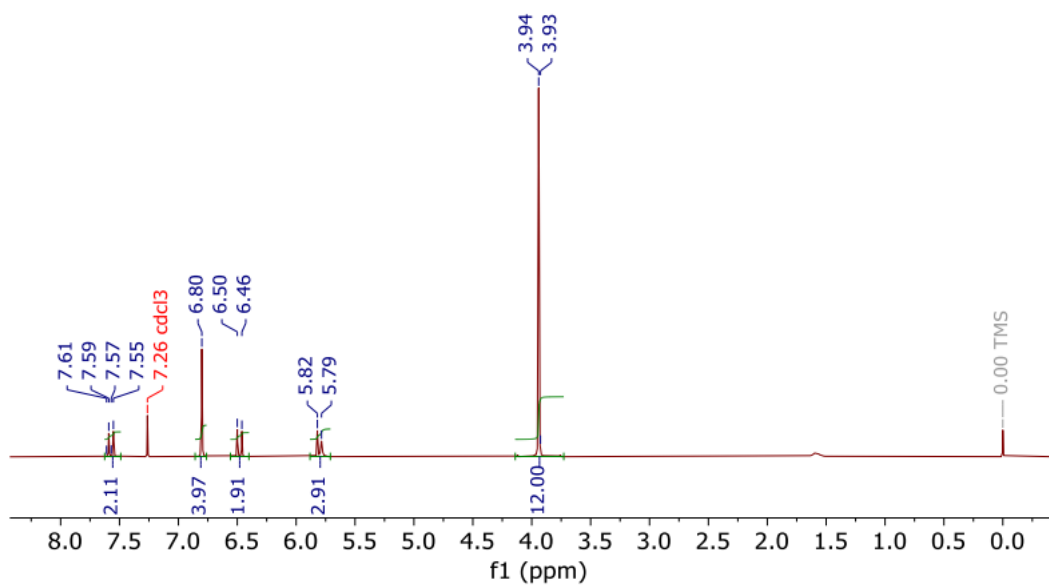

CARBON\_01

<sup>13</sup>C NMR, 100 MHz, AutoX\_DB

NM-167

CDCl<sub>3</sub>

11 Jun 2019

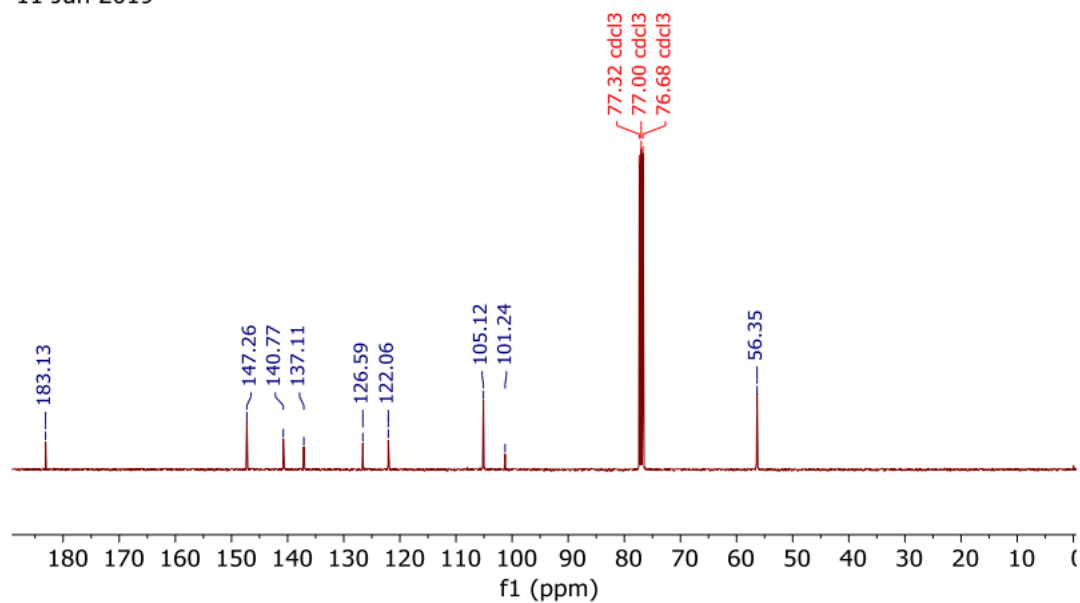

# NMR Spectrum of complex 1

PROTON\_03  
1H NMR, 400 MHz, AutoX\_DB  
JL-7b\_1\_MeOD  
CD3OD  
22 Aug 2019

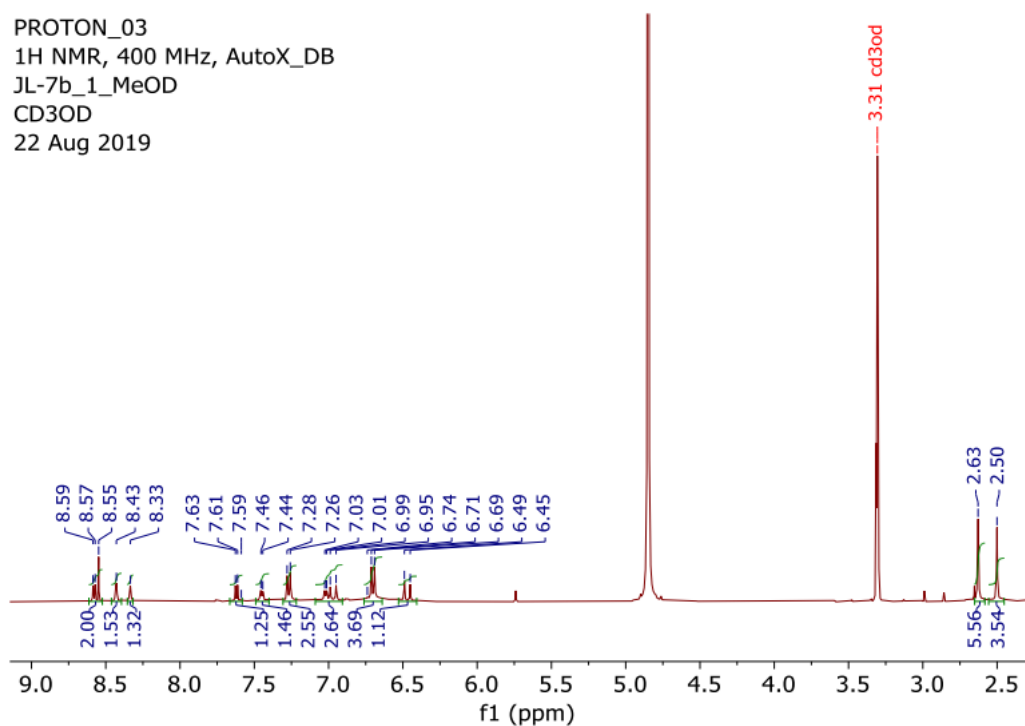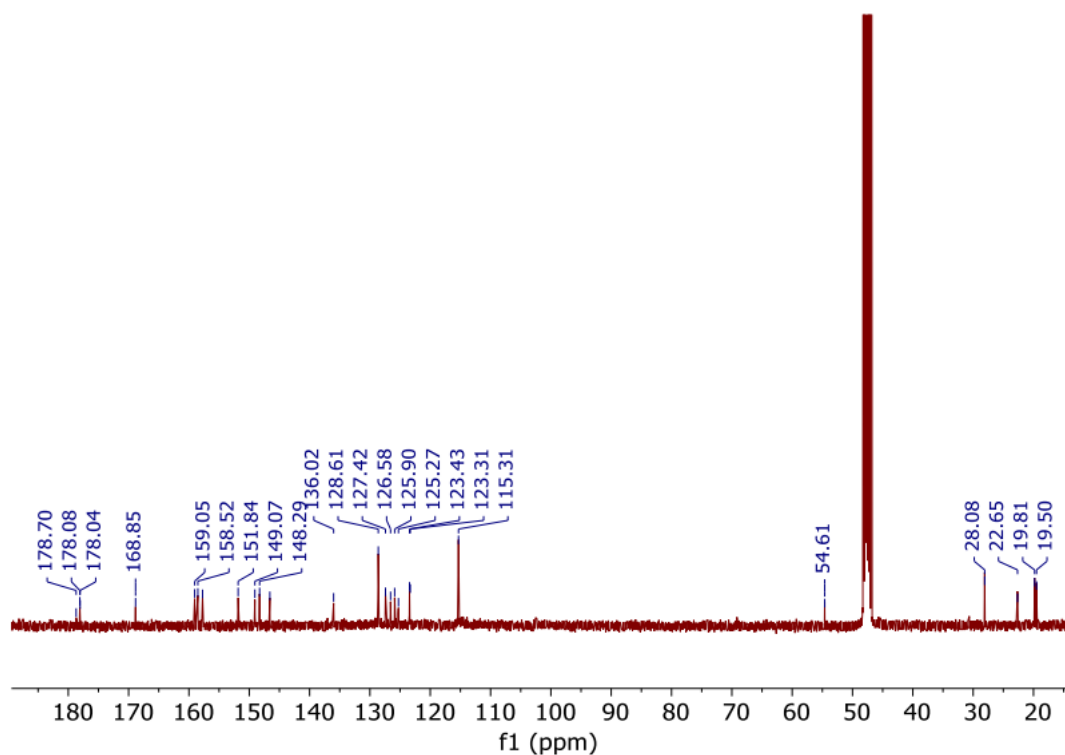

## 2D NMR measurements confirming the structure of complex 1

DQCOSY

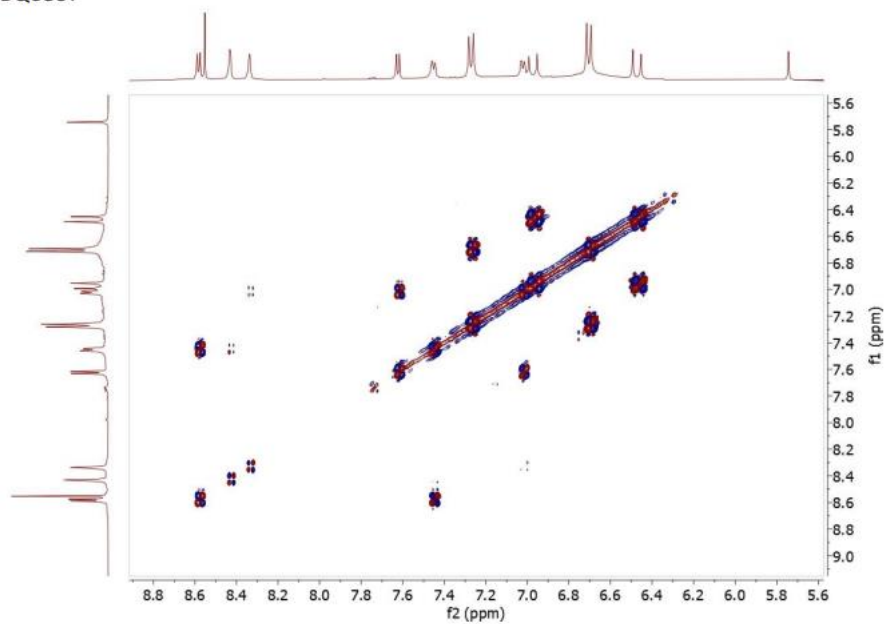

HSQC

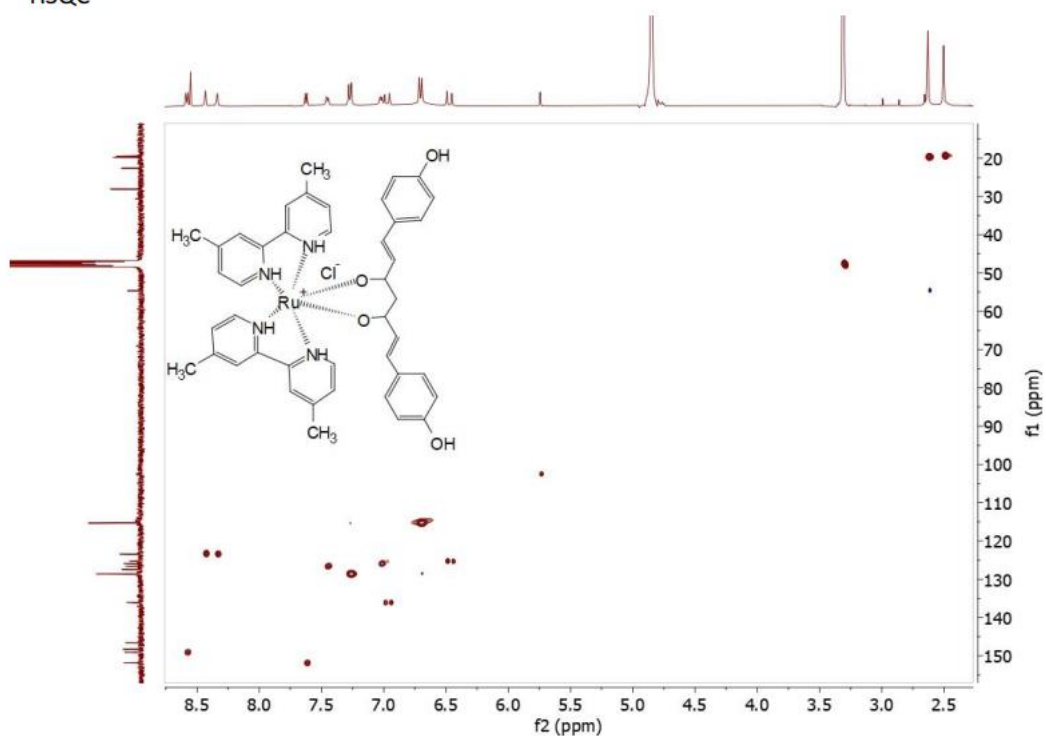

HMBC

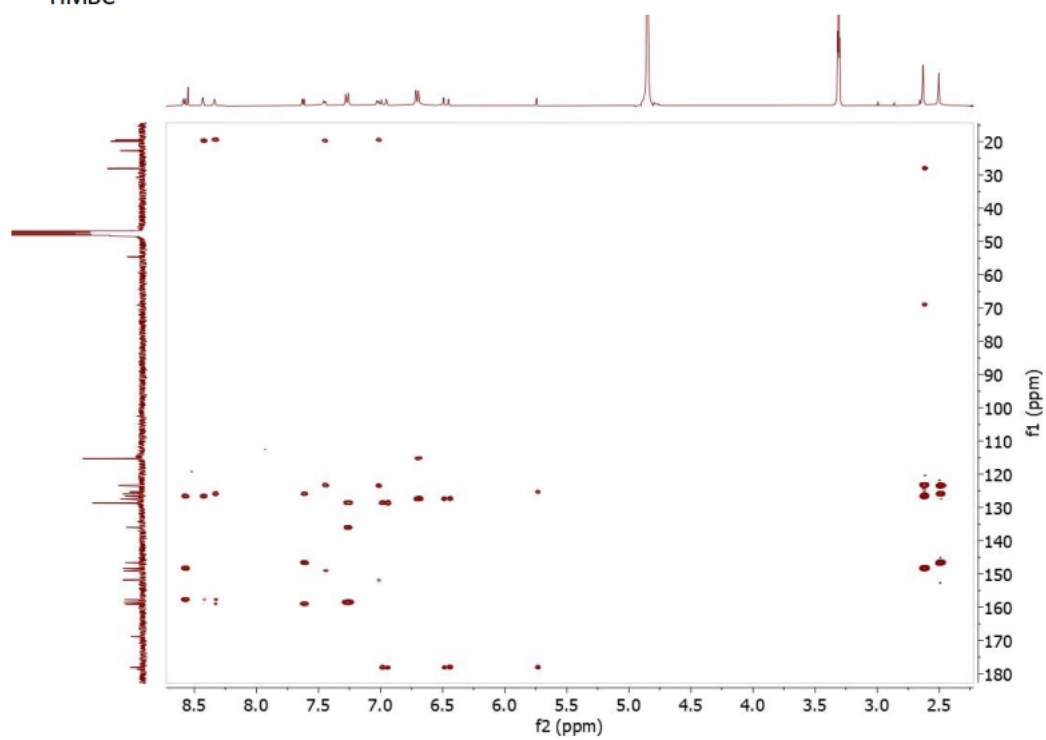

NMR of Complex 2  
 PROTON\_01  
 1H NMR, 400 MHz, AutoX\_DB  
 JL-9fp  
 CD3OD  
 22 Apr 2021

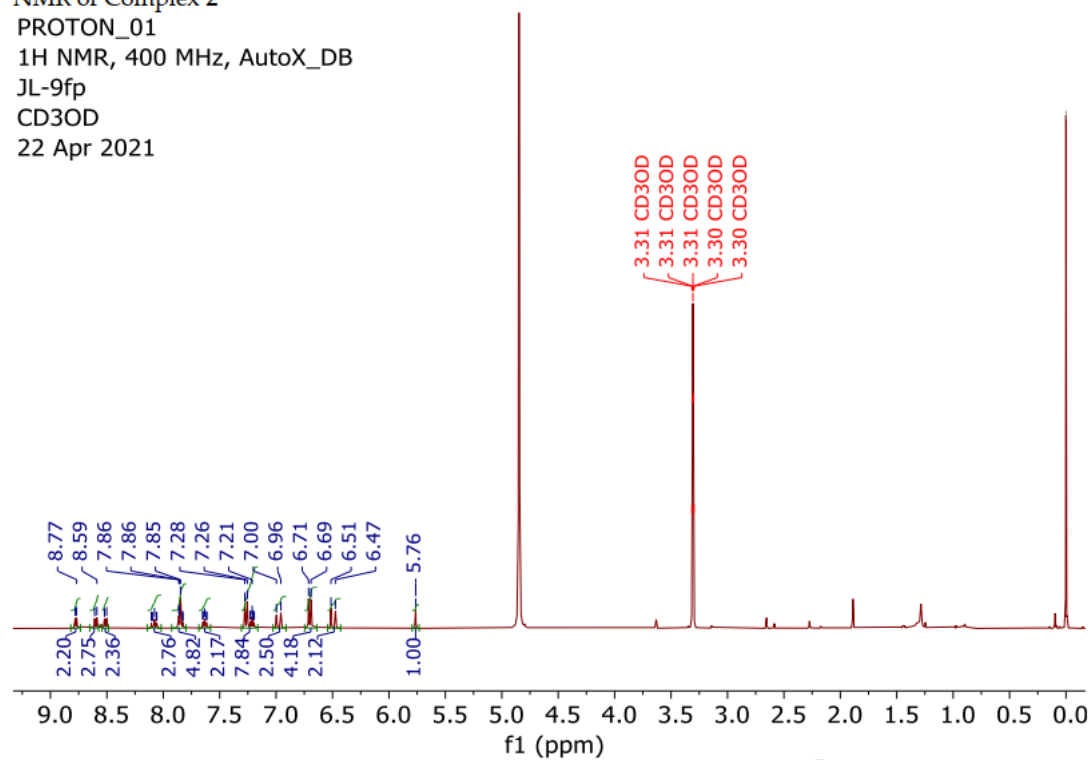

CARBON\_01  
 13C NMR, 100 MHz, AutoX\_DB  
 JL-9fp  
 CD3OD  
 22 Apr 2021

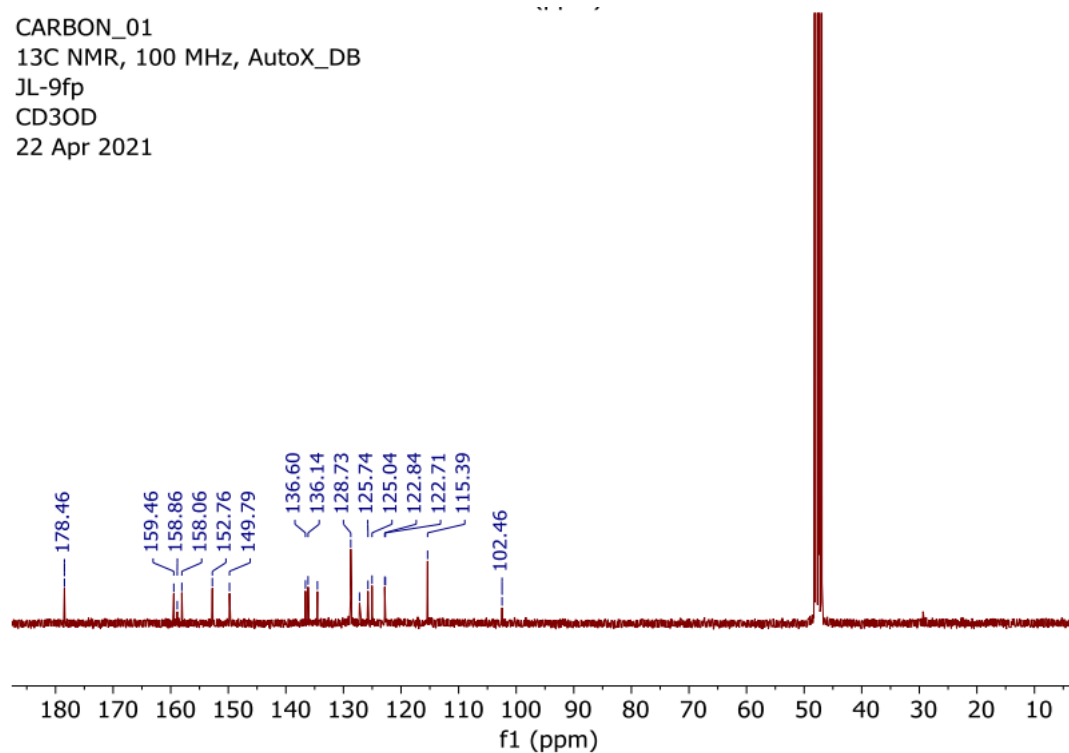

# NMR of Complex 3

PROTON\_01  
 1H NMR, 400 MHz, AutoX\_DB  
 JL-16d-21-26  
 CD3OD  
 24 Aug 2021

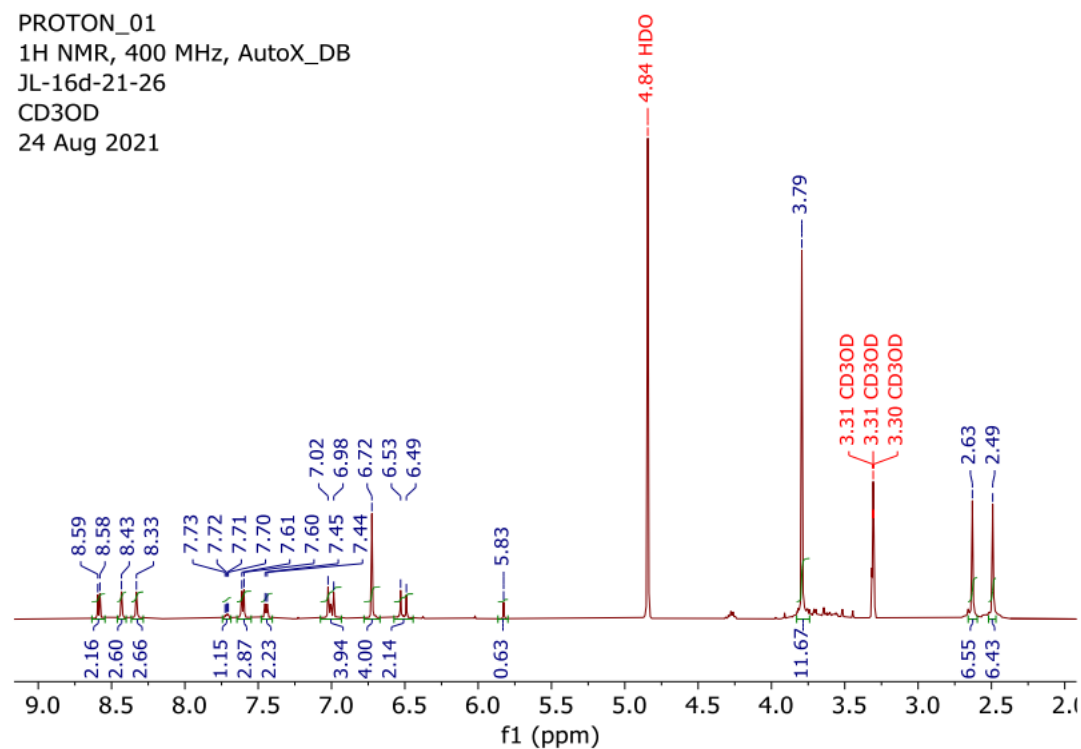

CARBON\_02  
 13C NMR, 100 MHz, AutoX\_DB  
 JL-16d-21-26  
 CD3OD  
 24 Aug 2021

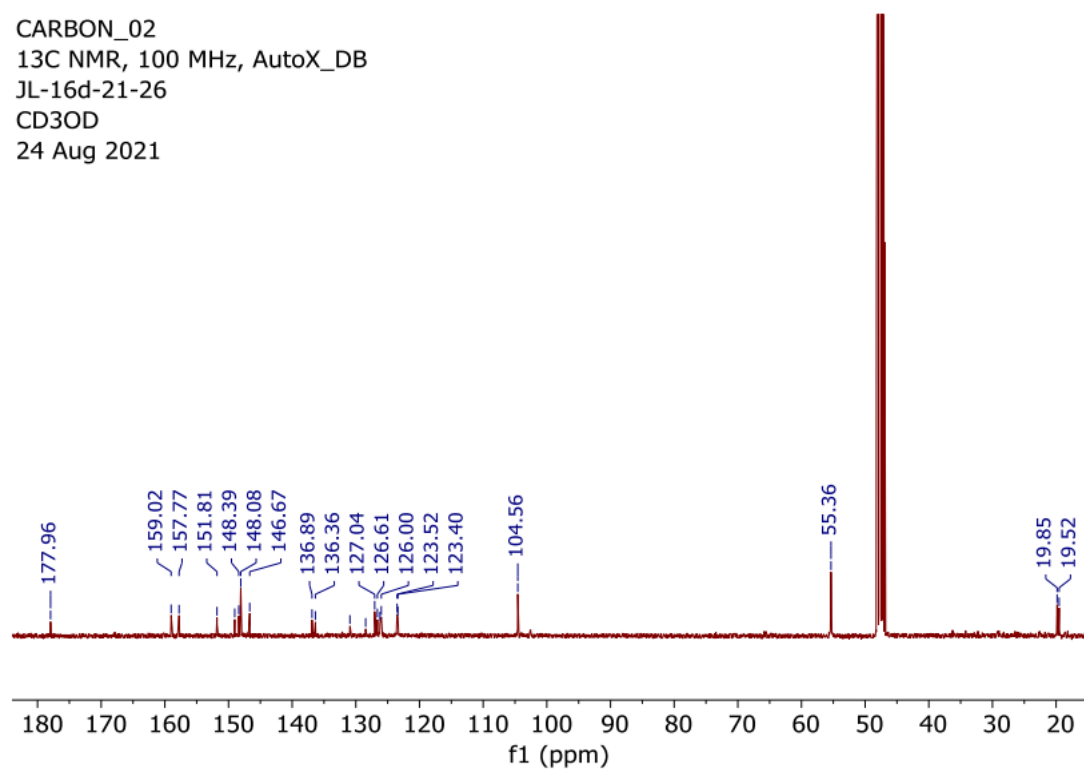



# NMR of Complex 4

PROTON\_01  
1H NMR, 400 MHz, AutoX\_DB  
JL-15fp  
CD3OD  
26 Apr 2021

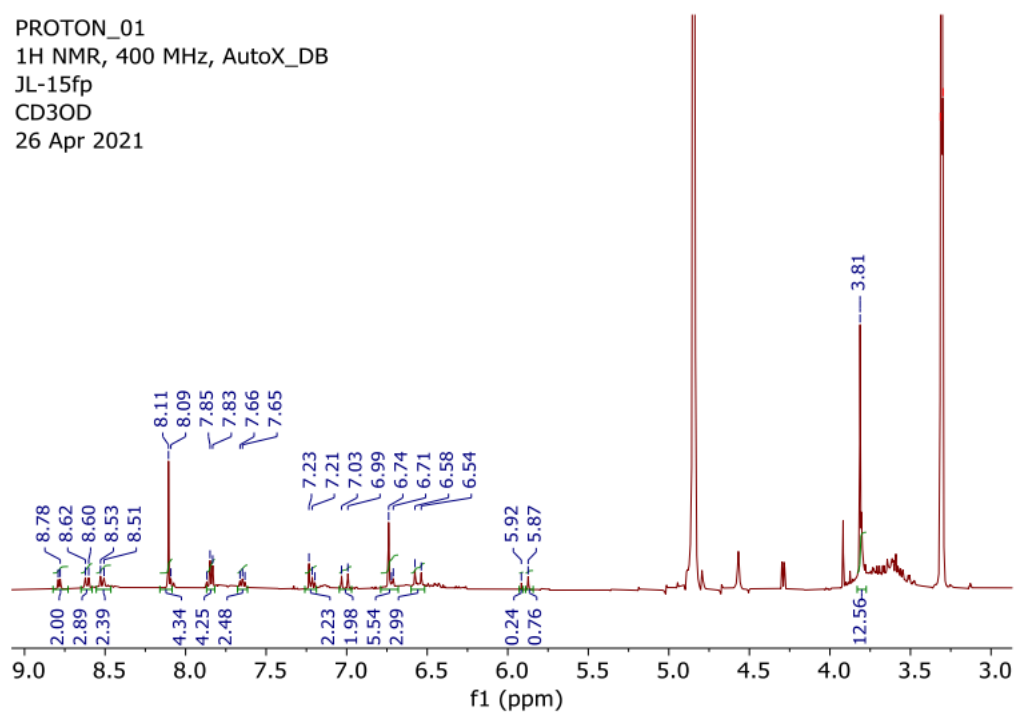

CARBON\_01  
1H NMR, 400 MHz, AutoX\_DB  
JL-15fp  
CD3OD  
26 Apr 2021

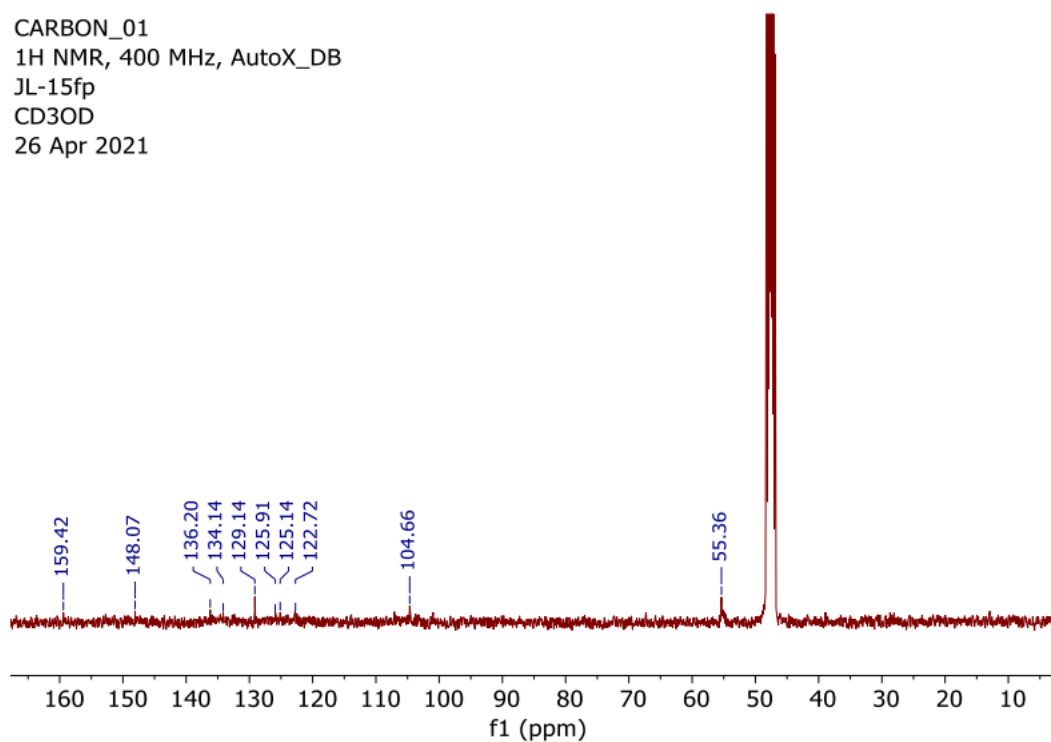

## HR-MS data

### Complex 1

043h39n404n: C43 H39 N4 O4 Ru1 pa C<sup>+</sup>

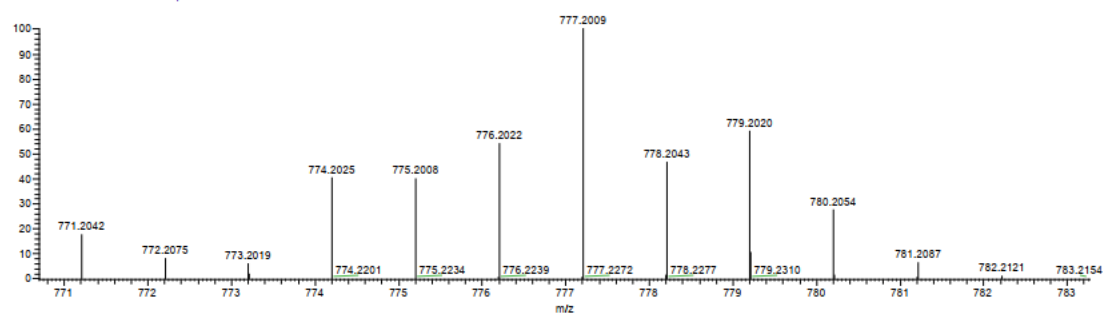

JL-7 #9 RT: 0.22 AV: 1 NL: 2.48E7  
T: FTMS + c ESI Full ms [120.00-1000.00]

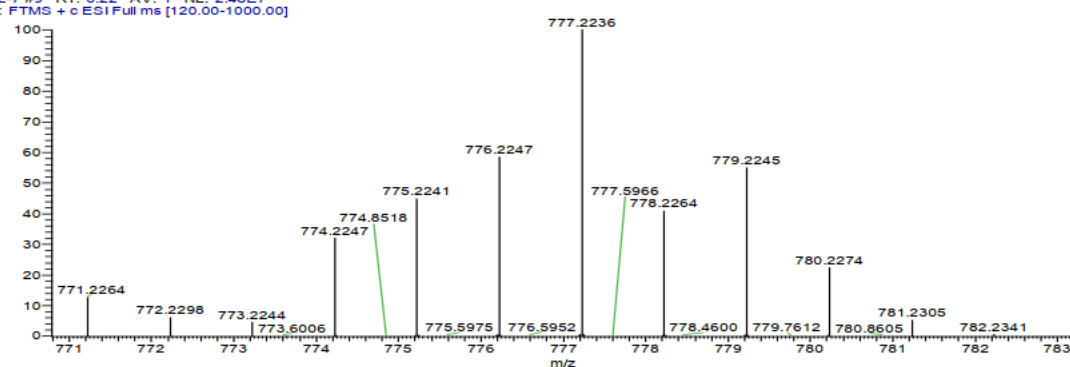

JL-7 #9 RT: 0.22 AV: 1 NL: 3.39E6  
T: FTMS + c ESI Full ms [120.00-1000.00]

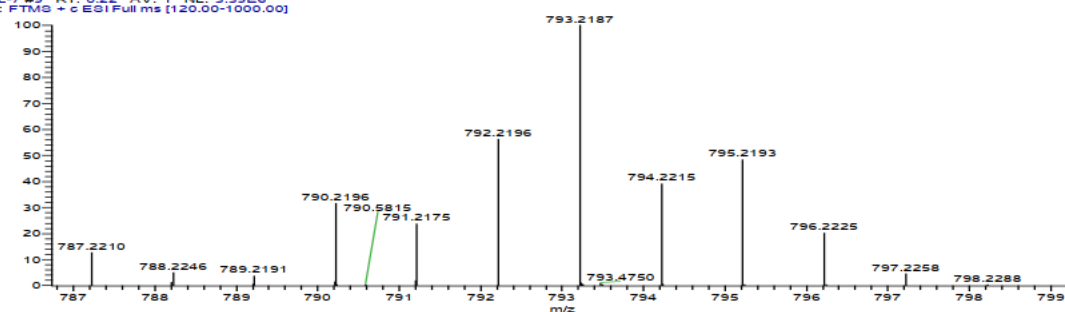

## Complex 2

c39h31n4o4Ru: C39 H31 N4 O4 Ru1 pa Chro 1

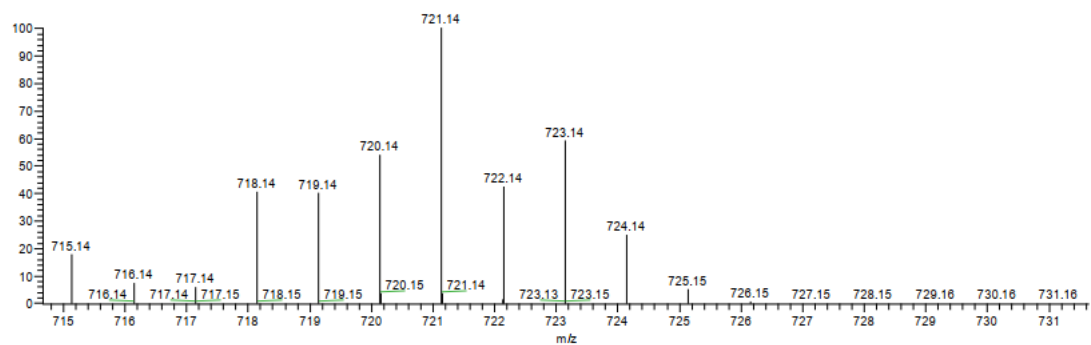

JL-9 #1 RT: 0.02 AV: 1 NL: 1.77E7  
T: FTMS + c ESI Full ms [120.00-1000.00]

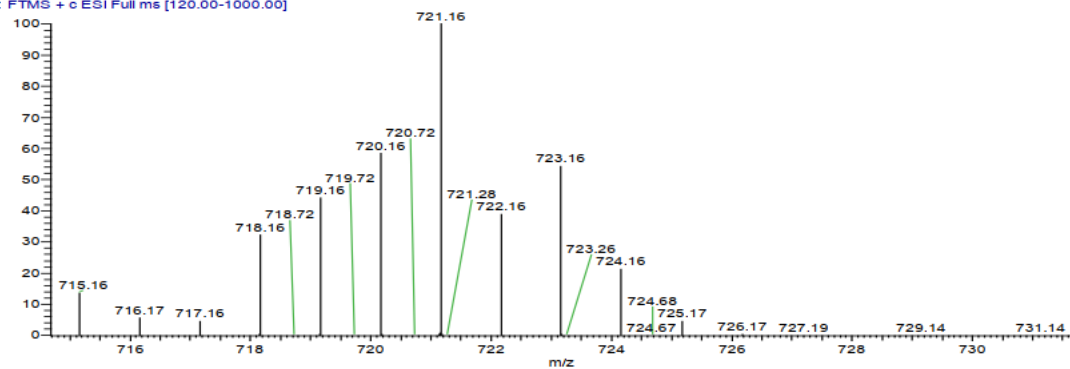

## Complex 3

c47h47n4o8Ru: C47 H47 N4 O8 Ru1 pa Chrg 1

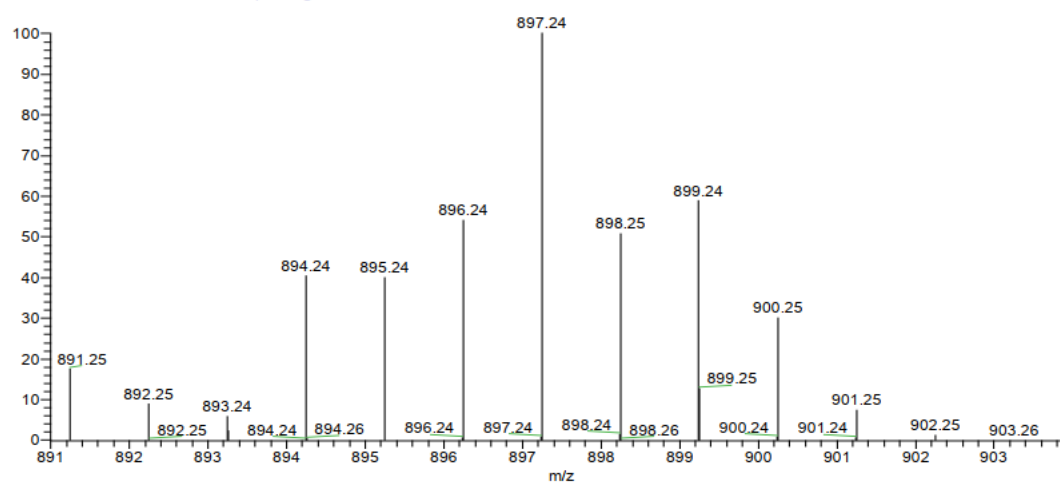

JL-16 #4 RT: 0.10 AV: 1 NL: 1.16E8  
T: FTMS + c ESIFull ms [120.00-1000.00]

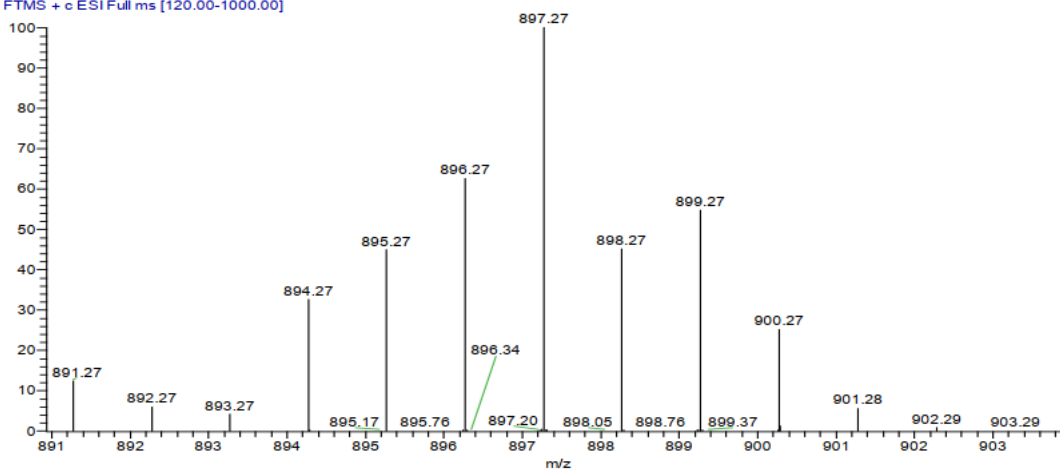

## Complex 4

c43h39n4o8Ru: C43 H39 N4 O8 Ru1 pa Chrg 1

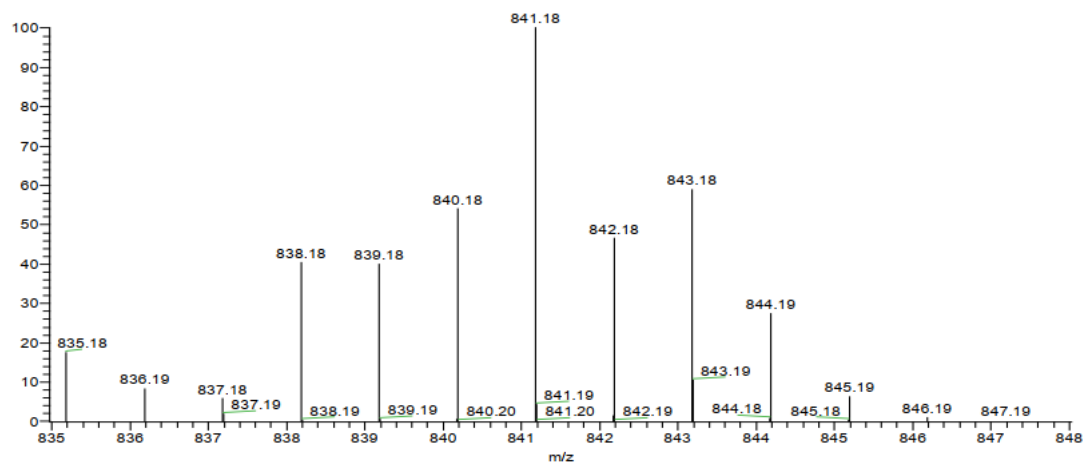

JL-15 #5 RT: 0.11 AV: 1 NL: 5.11E7  
T: FTMS + c ESI Full ms [120.00-1000.00]

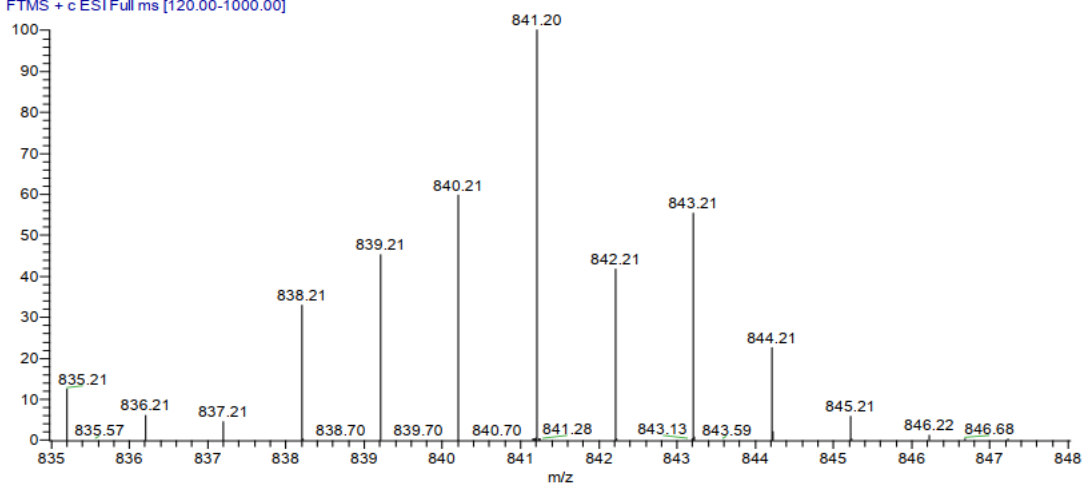

## IR Spectra

### L1 - BDMC

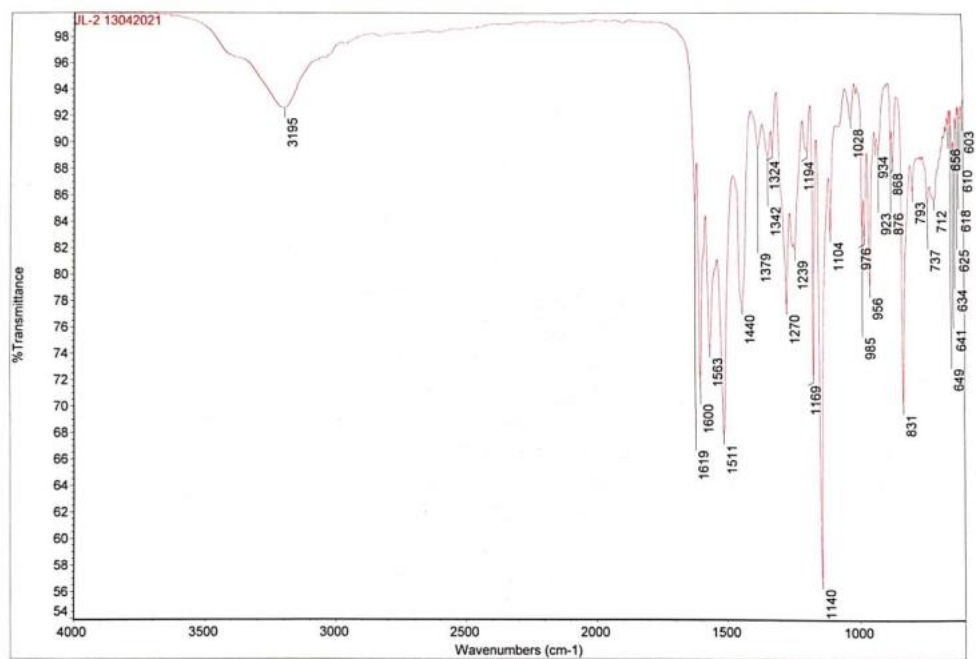

### L2 - Syringaldehyde curcumin

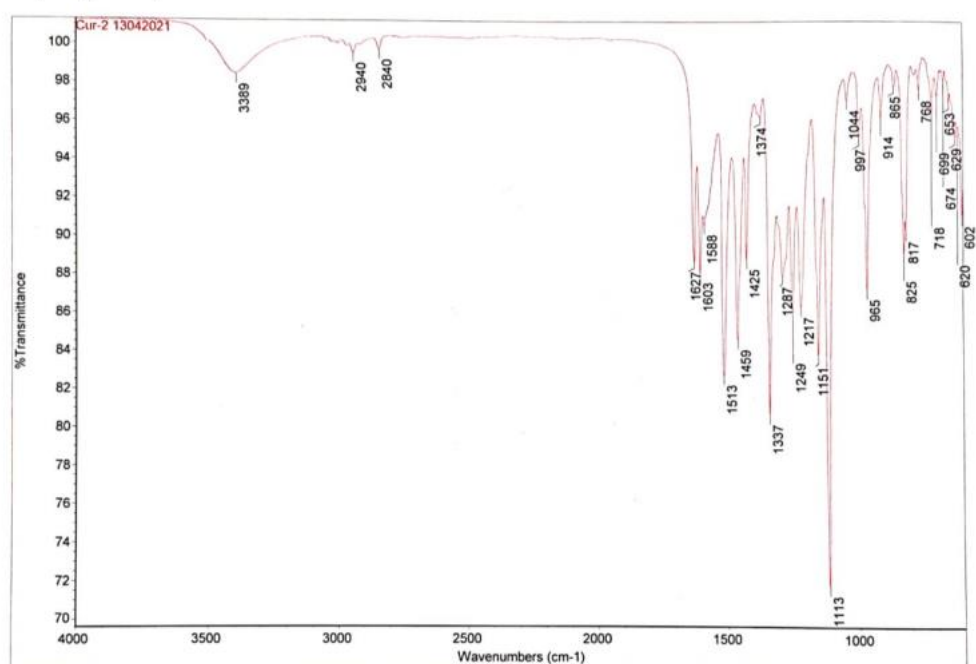

Complex 1

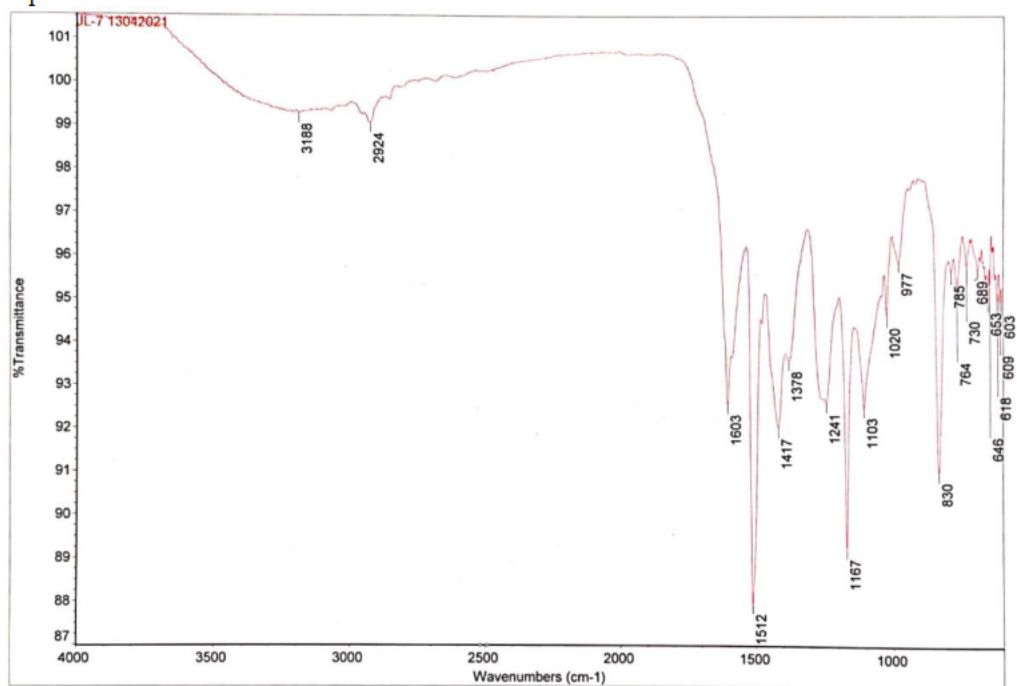

Complex 2

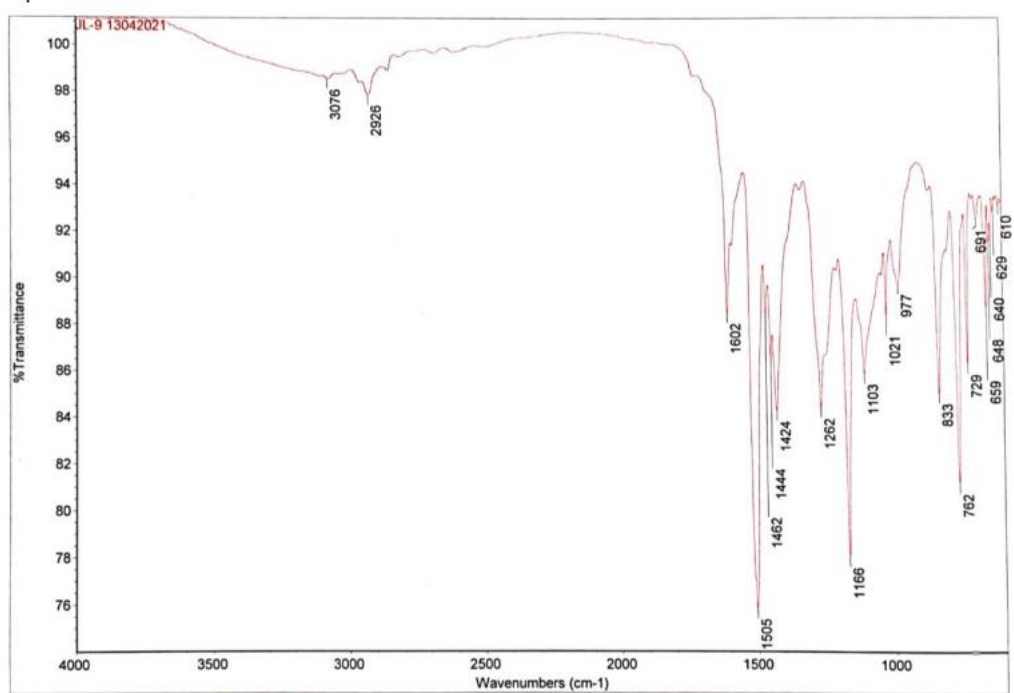

### Complex 3

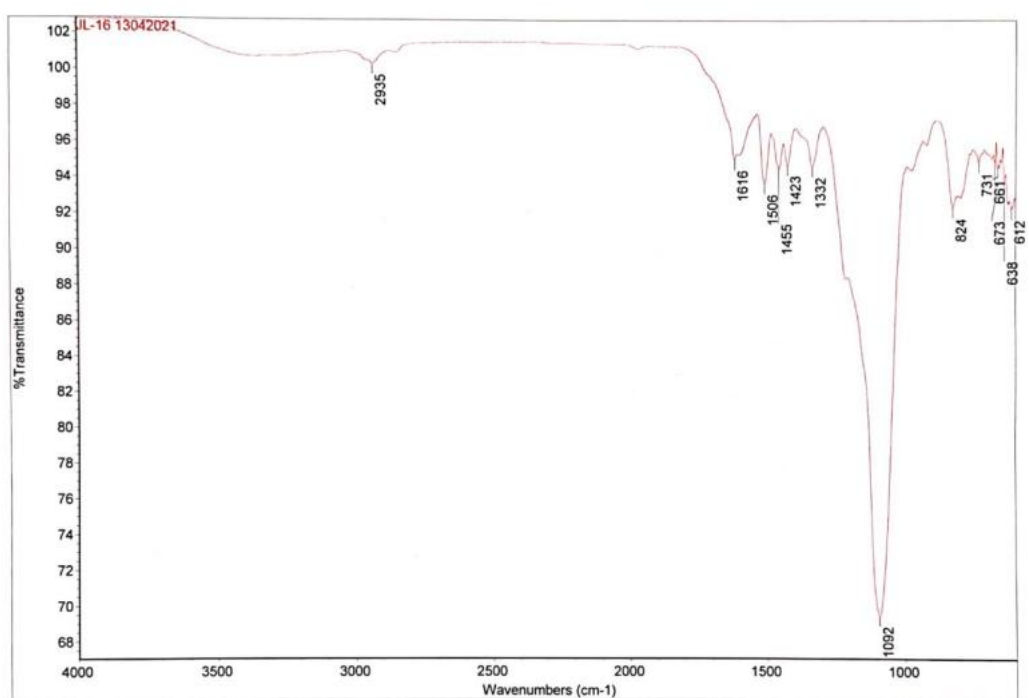

### Complex 4

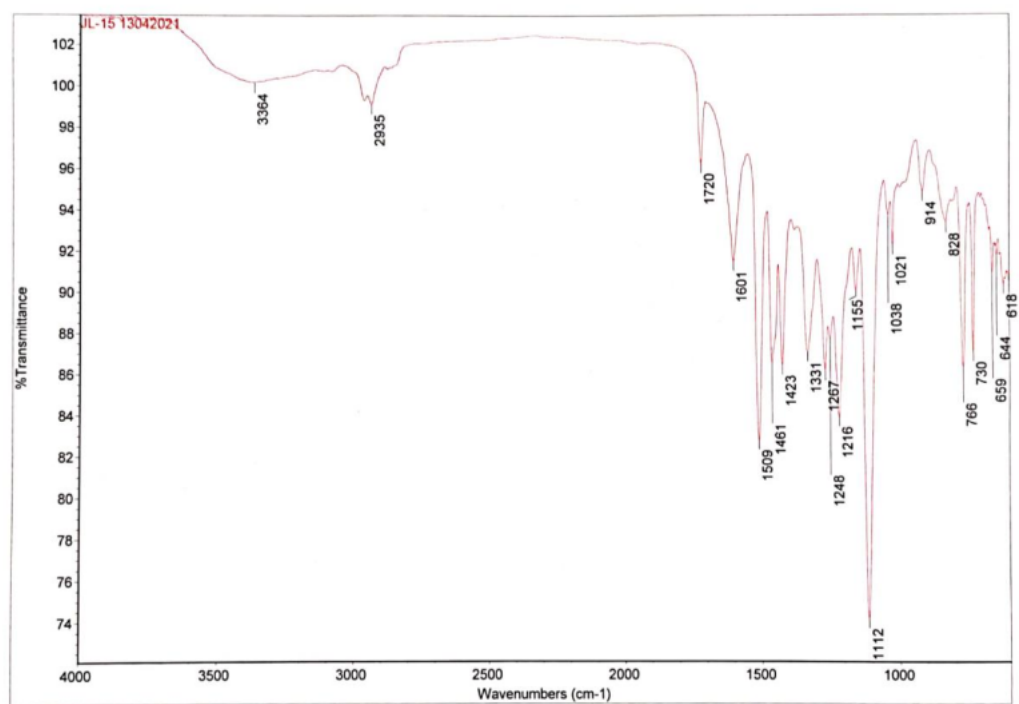



### Complexes 1 and 2

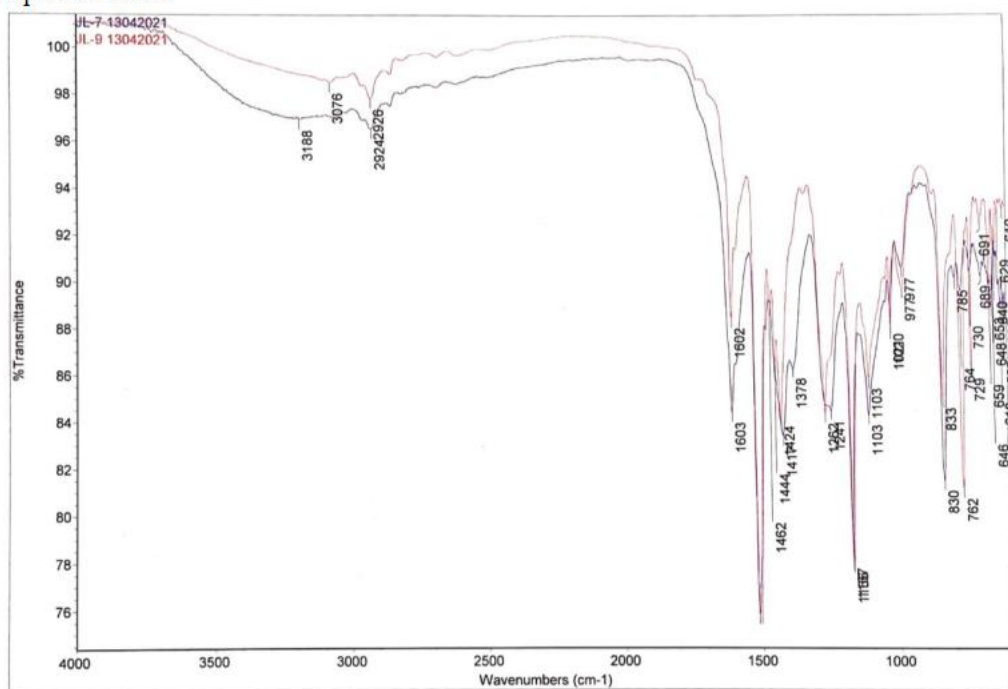

### Complexes 3 and 4

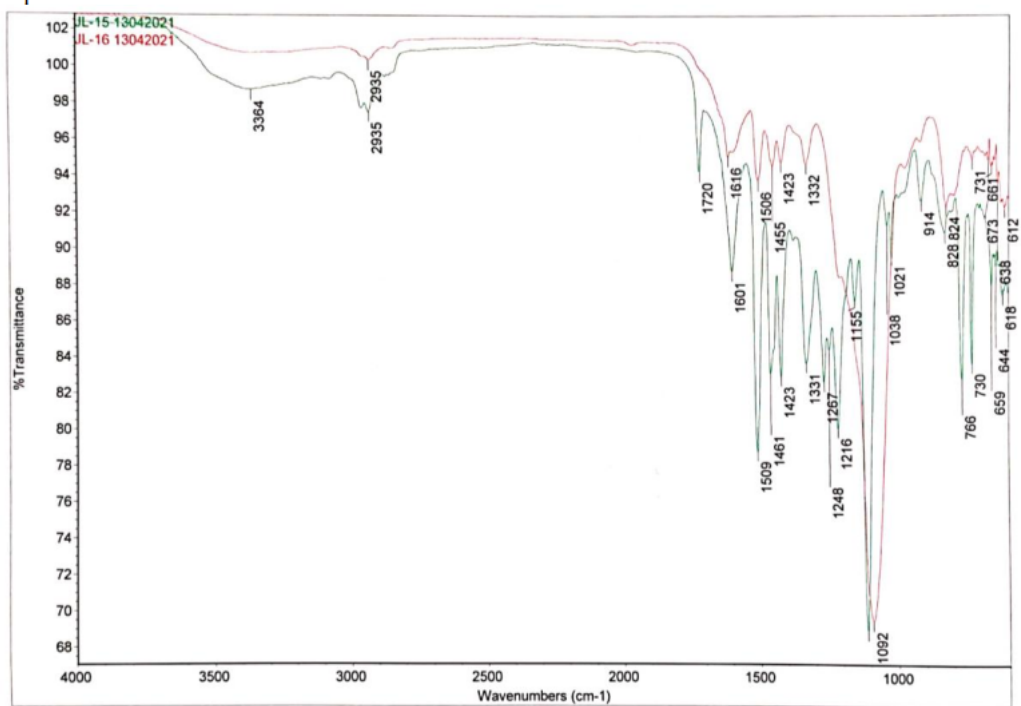

## Complexes 1 and 3

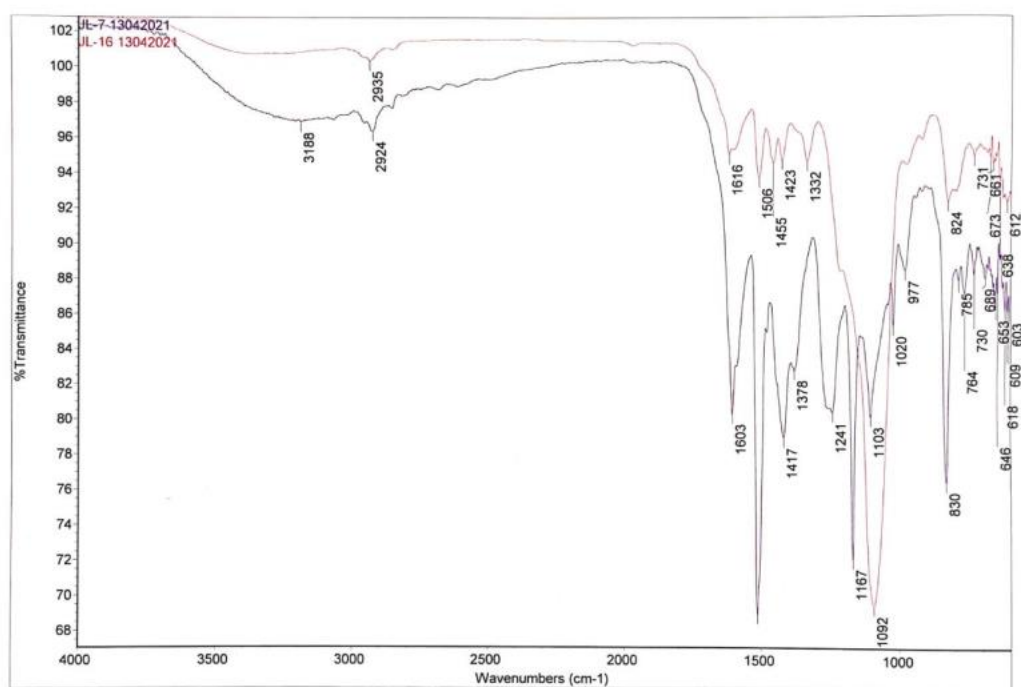

**Table S1** Eigenvalues provided by the Principal component analysis, based on active variables NF- $\kappa$ B, FGF-2 and MMP-9, in correlation with IC<sub>50</sub> values reflecting cytotoxicity.

| Variable         | Eigenvalue | % total variance | Cumulative Eigenvalue | Cumulative % |
|------------------|------------|------------------|-----------------------|--------------|
| NF- $\kappa$ B   | 1.804357   | 45.10894         | 1.804357              | 45.1089      |
| FGF-2            | 1.331217   | 33.28042         | 3.135574              | 78.3894      |
| MMP-9            | 0.706521   | 17.66303         | 3.842095              | 96.0524      |
| IC <sub>50</sub> | 0.157905   | 3.94761          | 4.000000              | 100.0000     |

**Table S2** Correlation matrix of factor coordinates generated by PCA, corresponding to the variations of IC<sub>50</sub>, NF- $\kappa$ B, FGF-2 and MMP-9 in A2780 cells following the time-dependent treatment with the series of novel synthesized ruthenium complexes **1-4**.

| Variable         | Factor 1  | Factor 2  | Factor 3  | Factor 4  |
|------------------|-----------|-----------|-----------|-----------|
| NF- $\kappa$ B   | 0.764701  | 0.506585  | -0.325586 | 0.229341  |
| FGF-2            | -0.351237 | 0.881138  | -0.241306 | -0.204939 |
| MMP-9            | -0.630277 | -0.387184 | -0.668951 | 0.073109  |
| IC <sub>50</sub> | 0.836046  | -0.385063 | -0.307882 | -0.240753 |

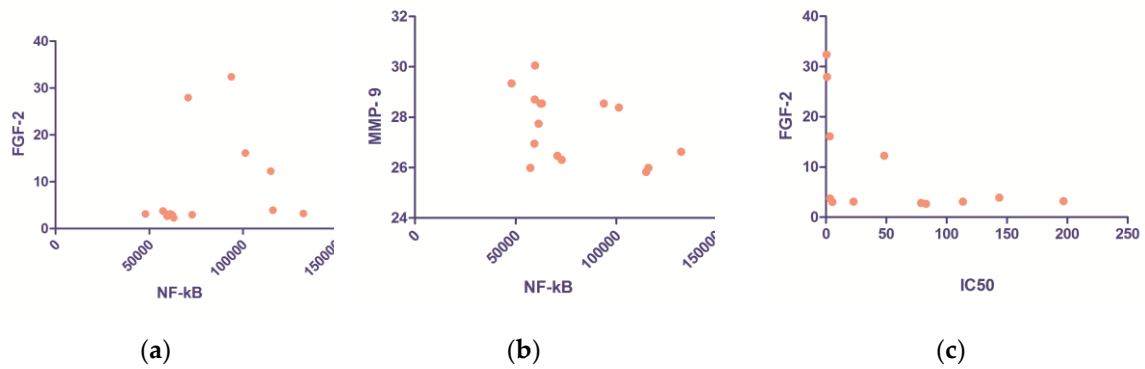

**Figure S1** The intracellular activated NF- $\kappa$ B p65 in treated A2780 cells **(a)** correlates well with FGF-2 secreted by the cells (nonparametric Spearman correlation coefficient  $r = 0.4665$ ,  $p$  value 0.0398), and **(b)** increases inversely proportional to MMP-9 ( $r = -0.4592$ ,  $p$  value 0.0425). As well, it is a significant negative correlation between **(c)** the compounds cytotoxicity and FGF-2 ( $r = -0.5604$ ,  $p$  value 0.0290).

## Stability studies of complexes 1-4 in methanol and stock solution (ethanol:water; 1:20)

### Complex 1 in methanol

Operator: PC19216812\hp  
Created: 13. 6. 2022 11:45:22  
Spectrophotometer: GENESYS 10S UV-Vis  
Serial number: 2L9P364001  
Firmware: 4.003  
Baseline: 13. 6. 2022 11:45:22

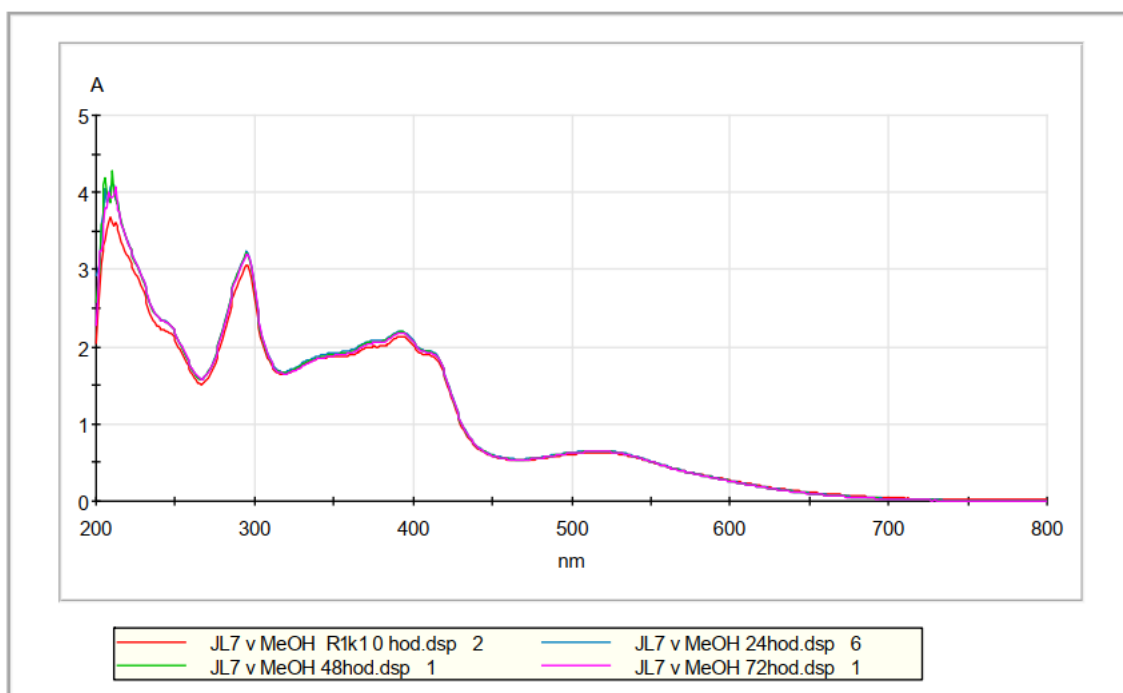

## Complex 2 in Methanol

Operator: PC19216812\hp  
Created: 14. 6. 2022 11:55:03  
Spectrophotometer: GENESYS 10S UV-Vis  
Serial number: 2L9P364001  
Firmware: 4.003  
Baseline: 14. 6. 2022 11:55:03

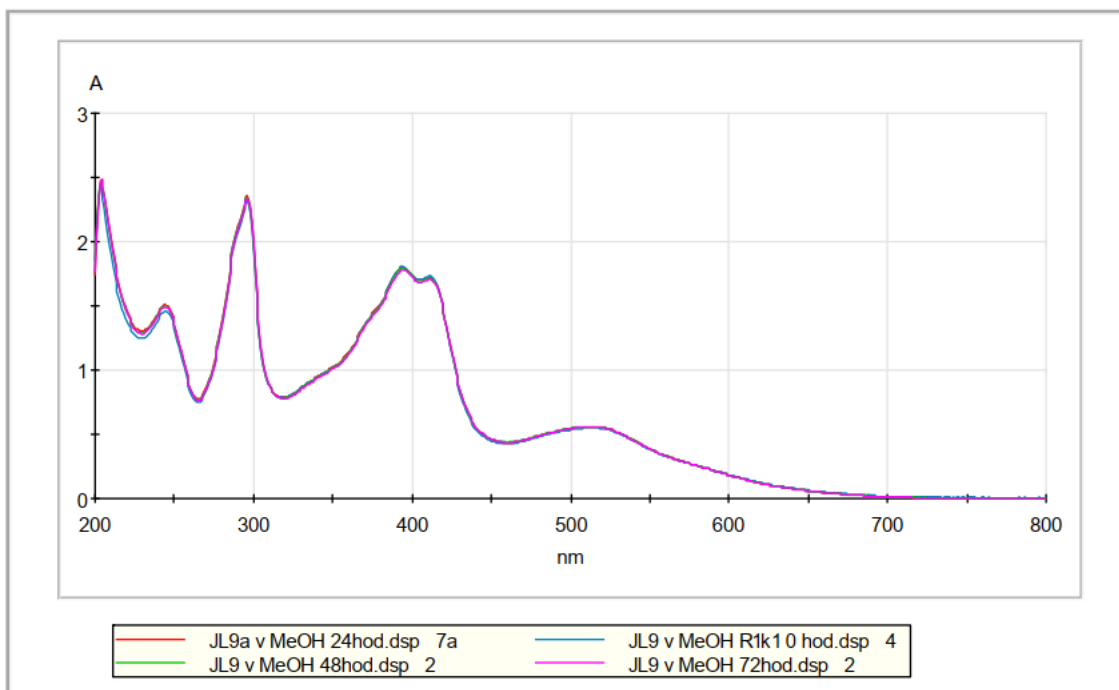

### Complex 3 in Methanol

Operator: PC19216812\hp  
Created: 13. 6. 2022 12:06:12  
Spectrophotometer: GENESYS 10S UV-Vis  
Serial number: 2L9P364001  
Firmware: 4.003  
Baseline: 13. 6. 2022 12:06:12

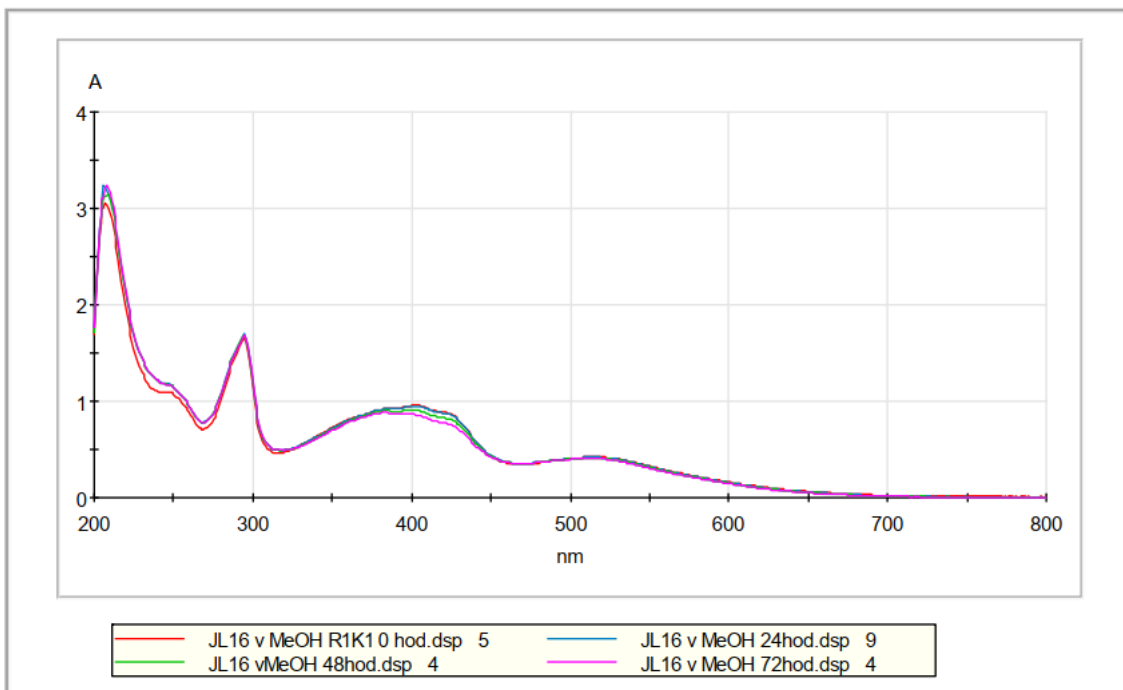

## Complex 4 in Methanol

Operator: PC19216812\hp  
Created: 13. 6. 2022 12:01:46  
Spectrophotometer: GENESYS 10S UV-Vis  
Serial number: 2L9P364001  
Firmware: 4.003  
Baseline: 13. 6. 2022 12:01:46

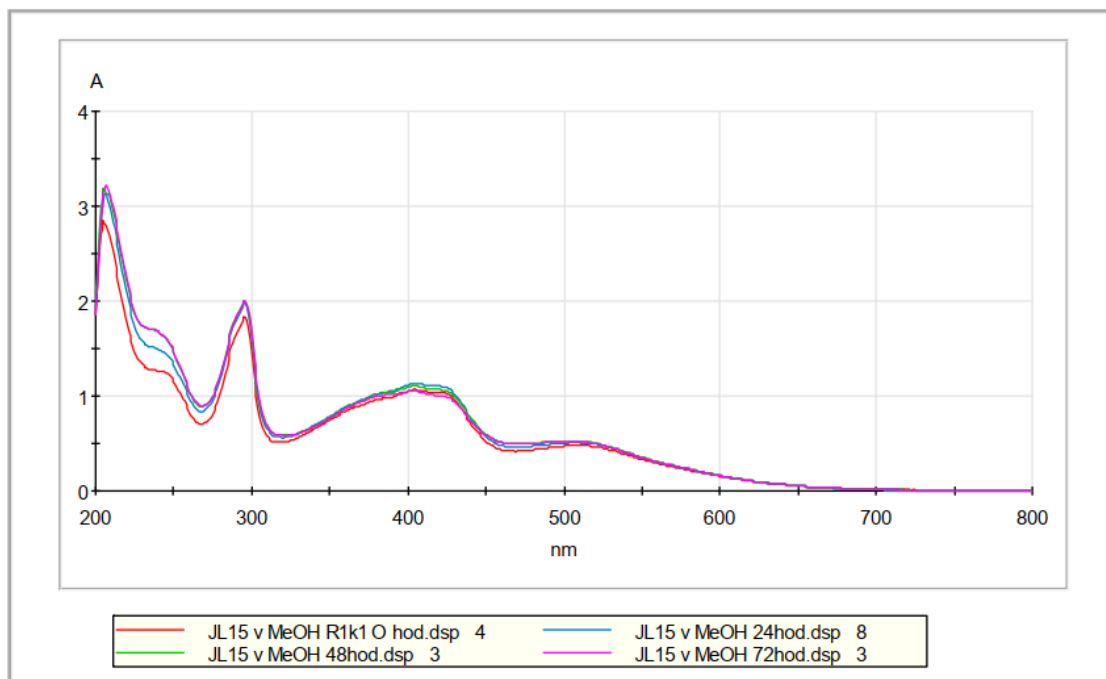

### Complex 1 in ethanol + water

Operator: PC19216812\hp  
Created: 13. 6. 2022 12:14:49  
Spectrophotometer: GENESYS 10S UV-Vis  
Serial number: 2L9P364001  
Firmware: 4.003  
Baseline: 13. 6. 2022 12:14:49

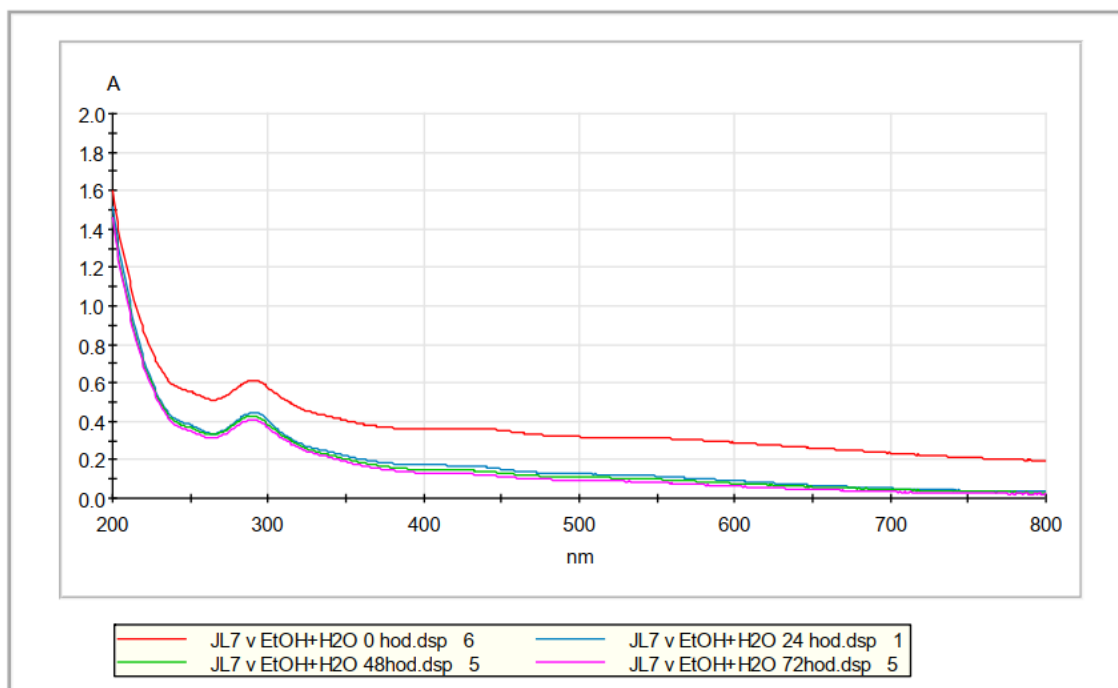



## Complex 2 in ethanol + water

Operator: PC19216812\hp  
Created: 13. 6. 2022 12:26:36  
Spectrophotometer: GENESYS 10S UV-Vis  
Serial number: 2L9P364001  
Firmware: 4.003  
Baseline: 13. 6. 2022 12:26:36

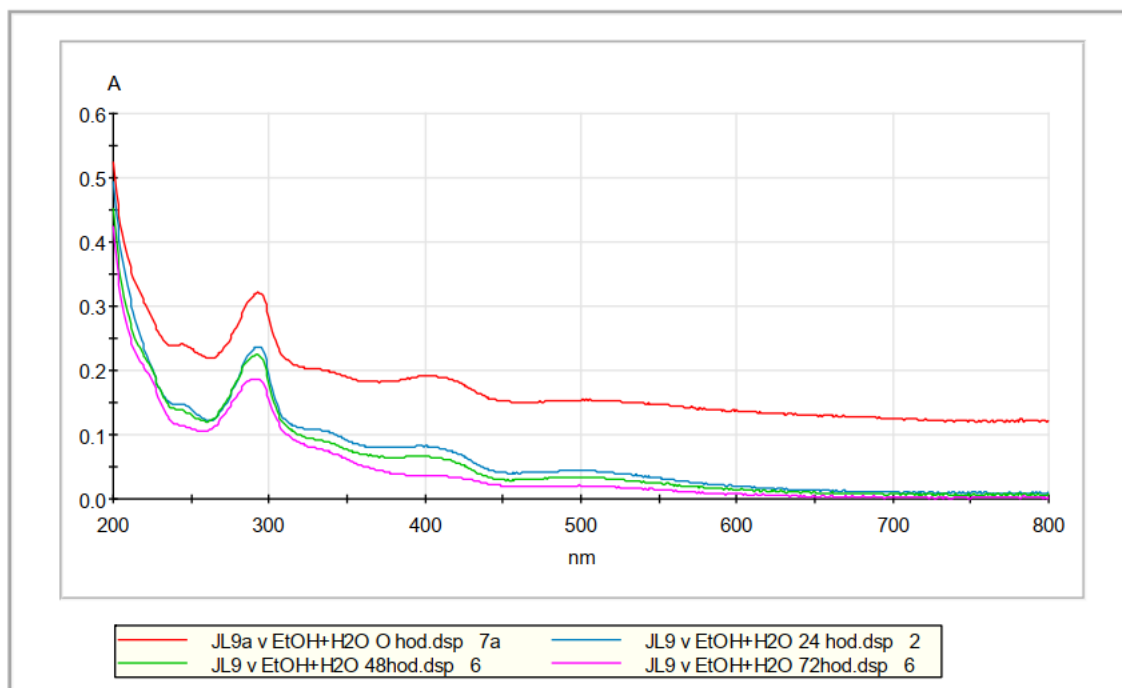

### Complex 3 in ethanol + water

Operator: PC19216812\hp  
Created: 13. 6. 2022 12:34:22  
Spectrophotometer: GENESYS 10S UV-Vis  
Serial number: 2L9P364001  
Firmware: 4.003  
Baseline: 13. 6. 2022 12:34:22

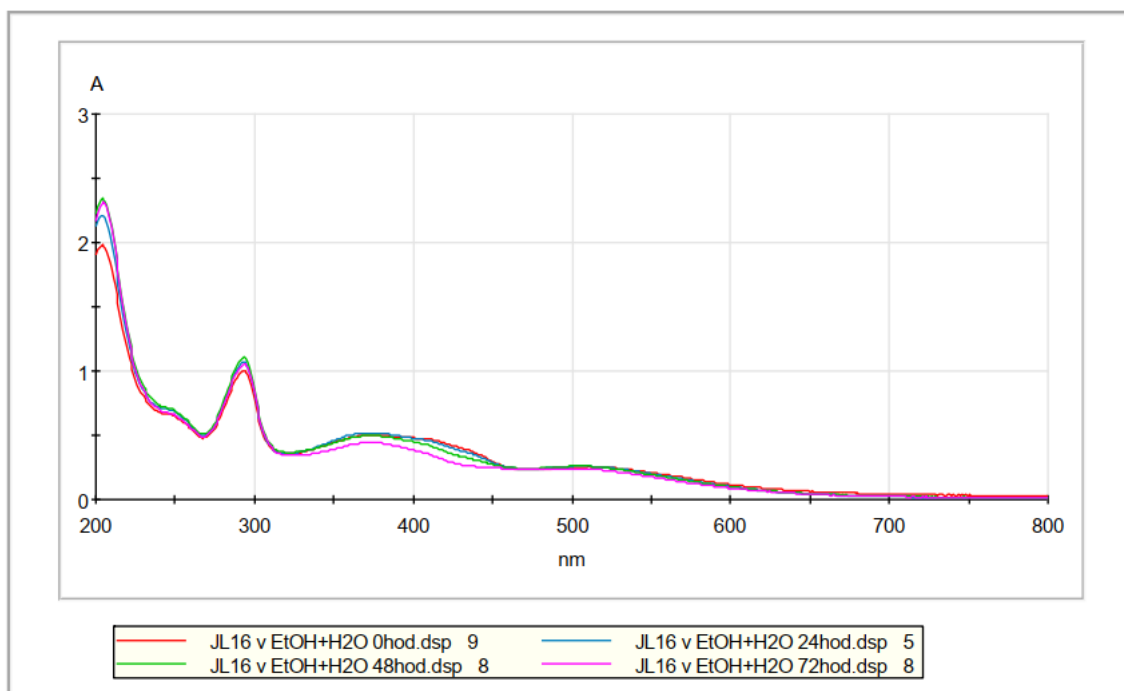

## Complex 4 in ethanol + water

Spectrum: JL15 v EtOH+H2O Ohod.dsp  
Description: 8  
Operator: PC19216812\hp  
Created: 13. 6. 2022 12:30:02  
Spectrophotometer: GENESYS 10S UV-Vis  
Serial number: 2L9P364001  
Firmware: 4.003  
Baseline: 13. 6. 2022 12:30:02

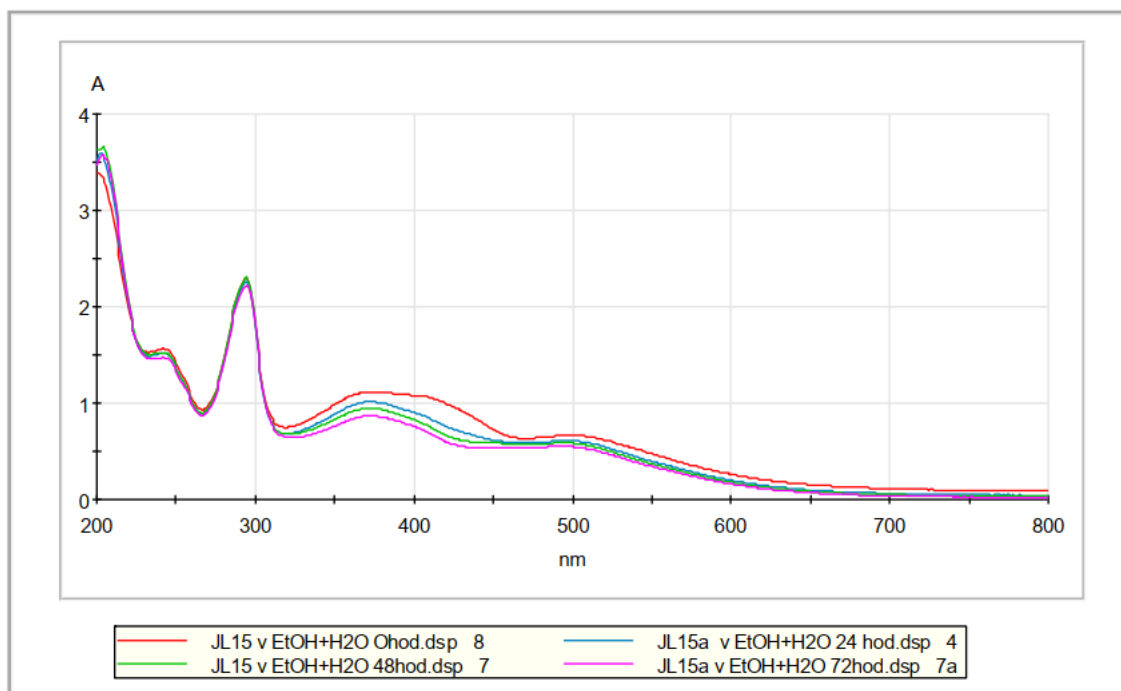

Supplement: s1 [file s1]
